# Supplementary material for: Transcription activation mechanism of a non-canonical bacterial DNA damage response pathway
Source: Research Square preprint supplement (doi:10.21203/rs.3.rs-7152246/v1), 2025-08-05
Supplement: Supplementary file 1 [file 57cb686ee5b88608ba979ebc.pdf]

## **Supplementary Information for:**

### **Transcription activation mechanism of a non-canonical bacterial DNA damage response pathway**

Rajiv R. Singh<sup>1</sup>, Amani Chinni<sup>2</sup>, Emily Cannistraci<sup>1</sup>, Raul Salinas<sup>1</sup>, Kevin Gozzi<sup>2</sup> and Maria A. Schumacher<sup>1</sup>

*<sup>1</sup>Department of Biochemistry, 307 Research Dr., Box 3711, Duke University Medical Center, Durham, NC 27710, USA.*

*<sup>2</sup>Rowland Institute at Harvard, 52 Oxford St, Harvard University, Cambridge, MA 02138*

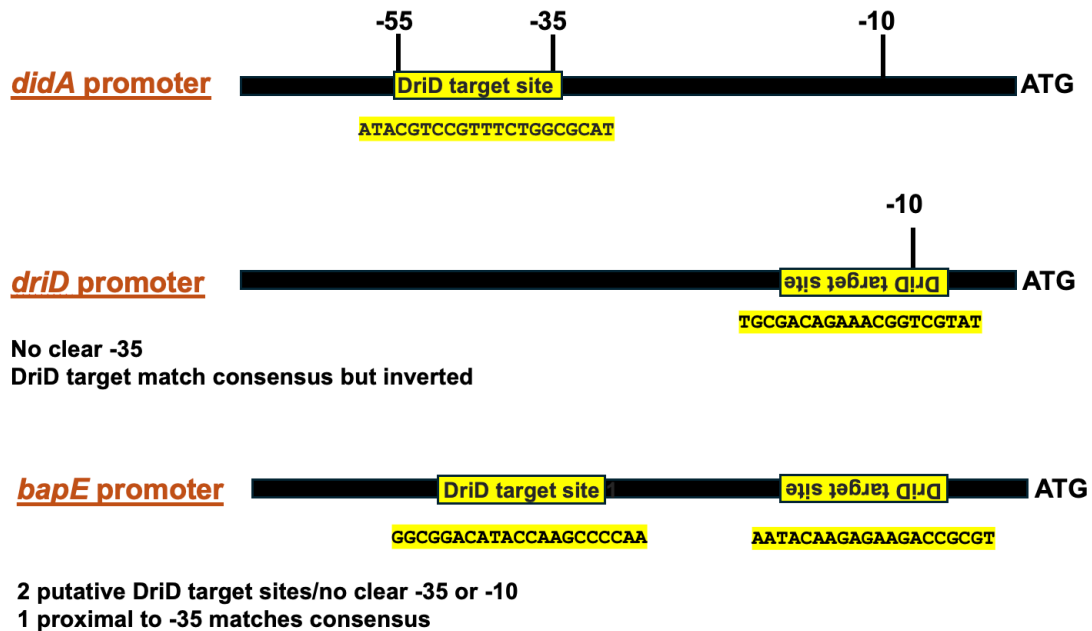

**Supplementary Figure 1. Promoters bound by DriD.** Shown are schematic diagrams of promoters (*didA*, *driD* and *bapE*) bound by DriD and utilized for cryo-EM structure determination in this study. Putative DriD target DNA binding sites are boxed and colored yellow with the sequence located beneath each. The transcription starts sites are indicated by ATG and the predicted -35 and other elements are indicated above each promoter.

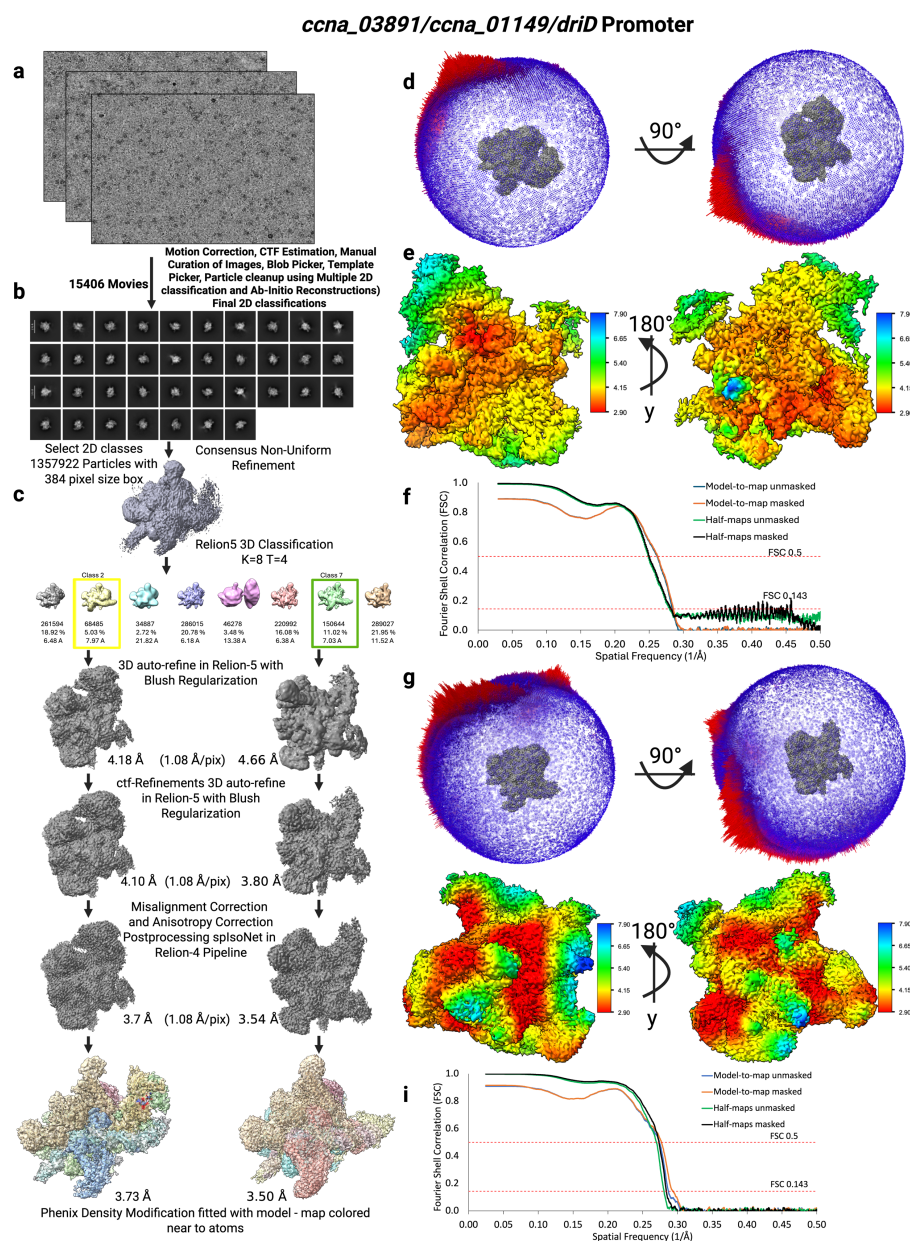

**Supplementary Figure 2. Cryo-EM data processing workflow of the DriD-ssDNA-RNAP- $\sigma$ 73-*CCNA\_03891/CCNA\_01149* promoter and RNAP- $\sigma$ 73-*CCNA\_03891/CCNA\_01149* promoter structures. (a) Representative micrographs. (b) A subset of the 2D classes showing clear structural features. (c) Flow diagram of the data processing strategy. (d) Angular distribution maps of the final particle set used in the reconstruction of *Cc*-DriD-ssDNA-RNAP- $\sigma$ 73-*CCNA\_03891/CCNA\_01149* (ccna) promoter complex. (e) Final map colored by local resolution of the *Cc*-DriD-ssDNA-RNAP- $\sigma$ 73-*CCNA\_03891/CCNA\_01149* promoter complex between 2.9-7.9 Å. (f) Masked and unmasked half-map and model FSC curves used to determine global resolution of the *Cc*-DriD-ssDNA-RNAP- $\sigma$ 73-*CCNA\_03891/CCNA\_01149* (ccna) promoter complex. (g) Angular distribution maps of the final particle set used in the reconstruction of the *Cc*-RNAP- $\sigma$ 73-*CCNA* promoter complex. (h) Final map colored by local resolution of the *Cc*-RNAP- $\sigma$ 73-*CCNA\_03891/CCNA\_01149* promoter complex dataset between 2.9-7.9 Å. (i) Masked and unmasked half-map and model FSC curves used to determine global resolution of the *Cc*-RNAP- $\sigma$ 73-*CCNA\_03891/CCNA\_01149* promoter complex.**

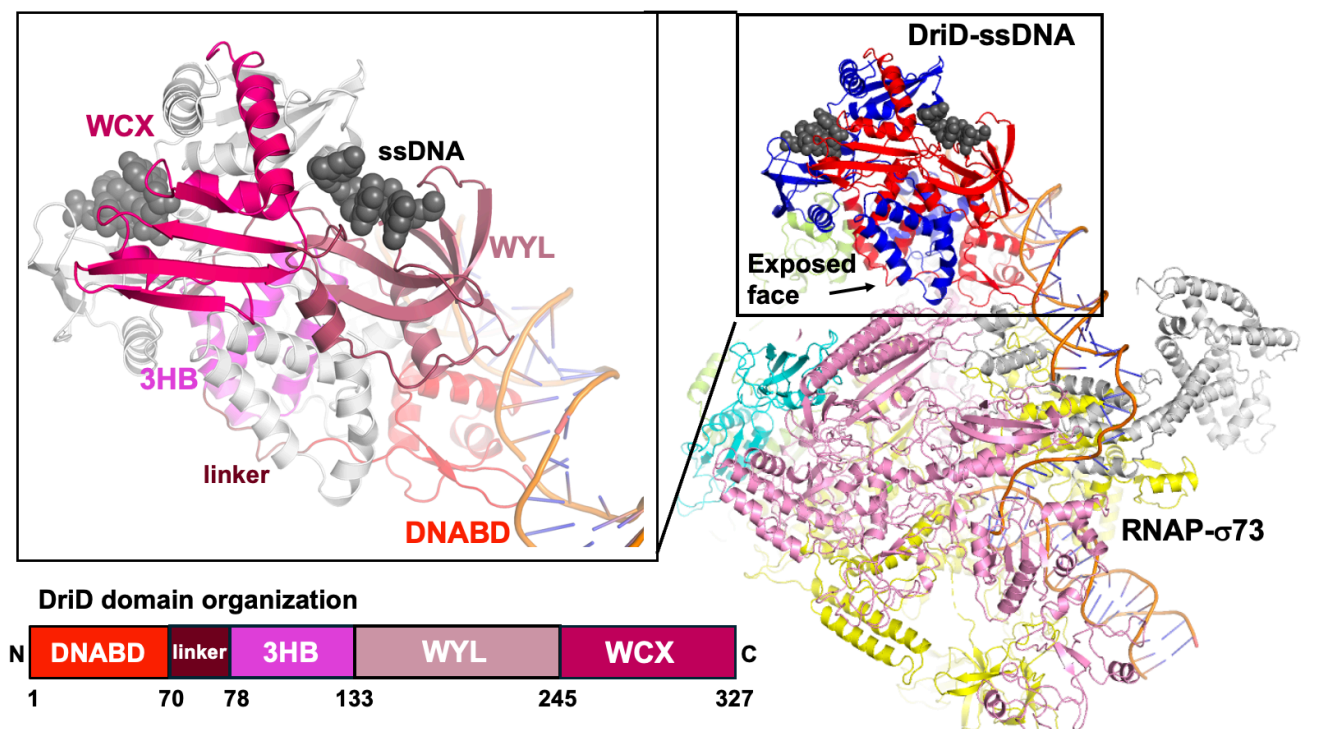

**Supplementary Figure 3. Domain organization and asymmetric binding of the DriD-ssDNA dimer to the promoter.** Right shows the overview of the DriD-ssDNA-RNAP-σ73-driD promoter complex. To the left is a close-up view showing just DriD-ssDNA with the domains colored as shown in the schematic below. Each domain is also labeled.



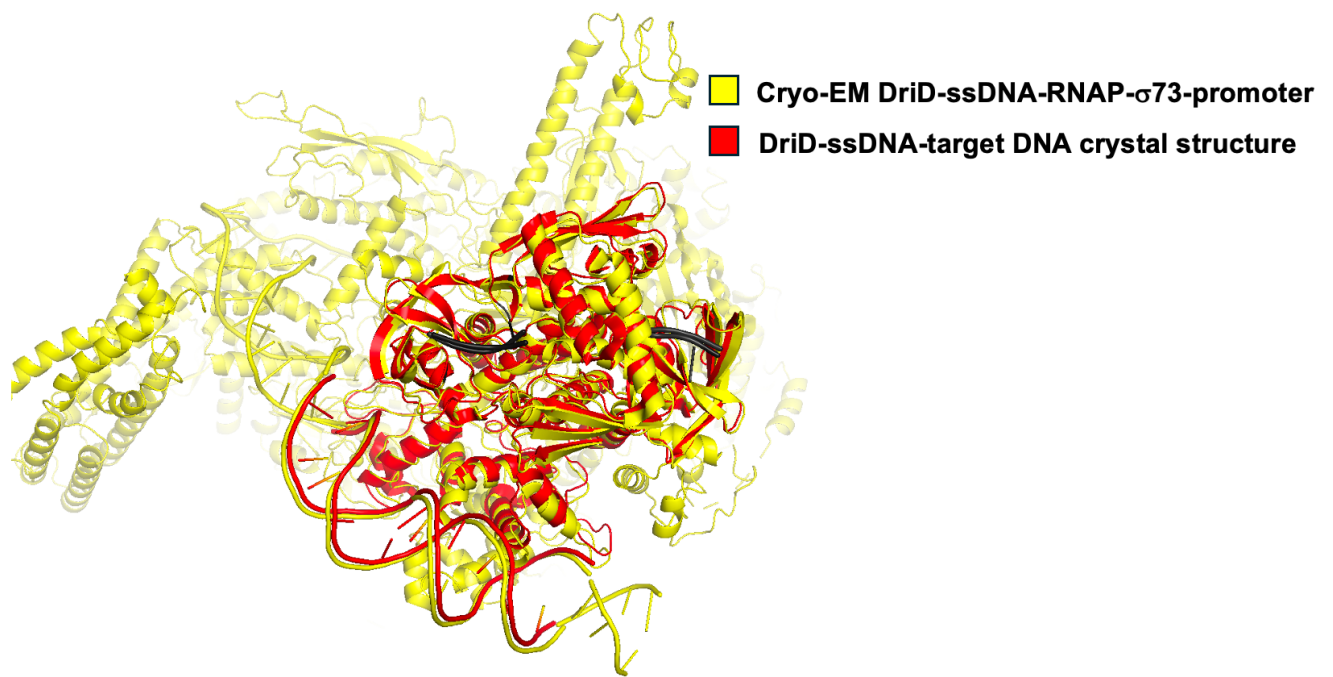

**Supplementary Figure 4. Overlay of the DriD-ssDNA-target DNA crystal structure onto promoter-RNAP-bound DriD.** In the overlay, the DriD-ssDNA-target DNA crystal structure is red and the cryo-EM DriD-ssDNA-RNAP- $\sigma$ 73-promoter structure is colored yellow.

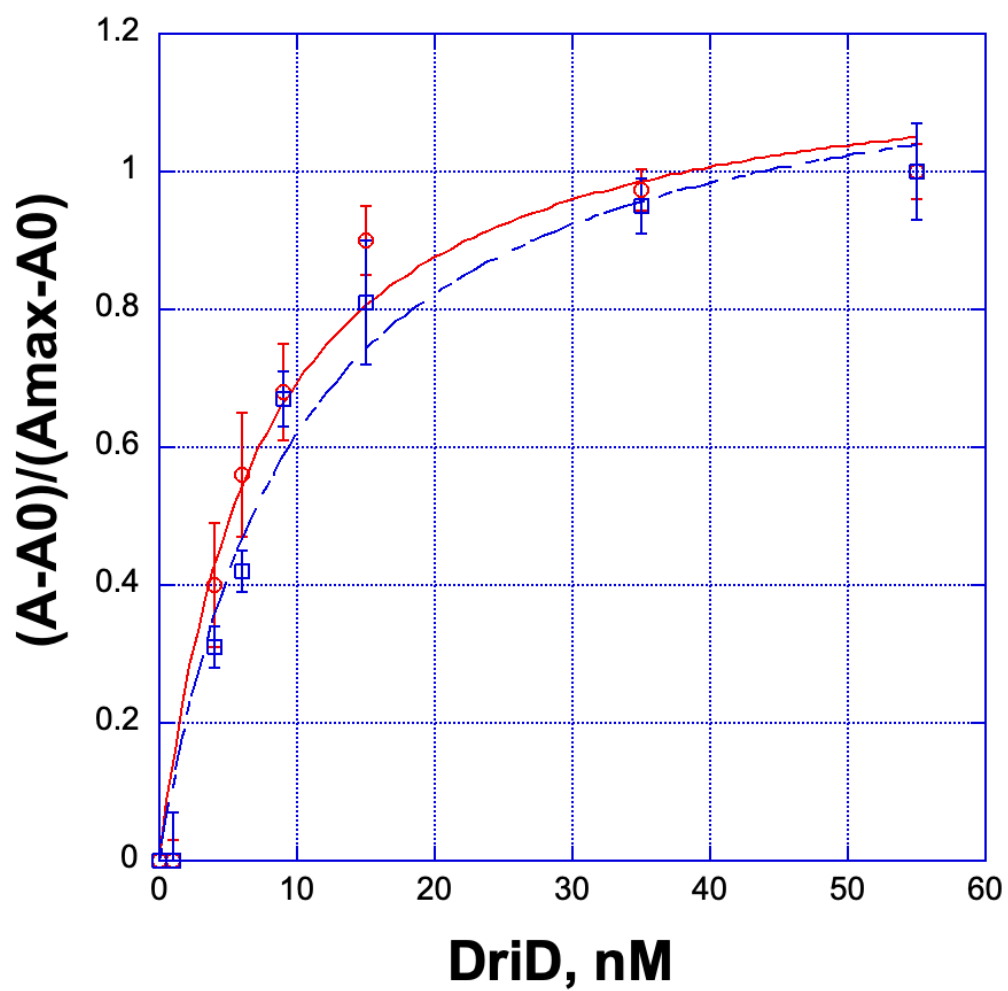

**Supplementary Figure 5.** FP binding isotherm showing binding of WT DriD (red circles) and DriD(G18K-A20K) (blue squares) in the presence of 100  $\mu$ M ssDNA binding to target DNA. Three technical replicates were done for each.

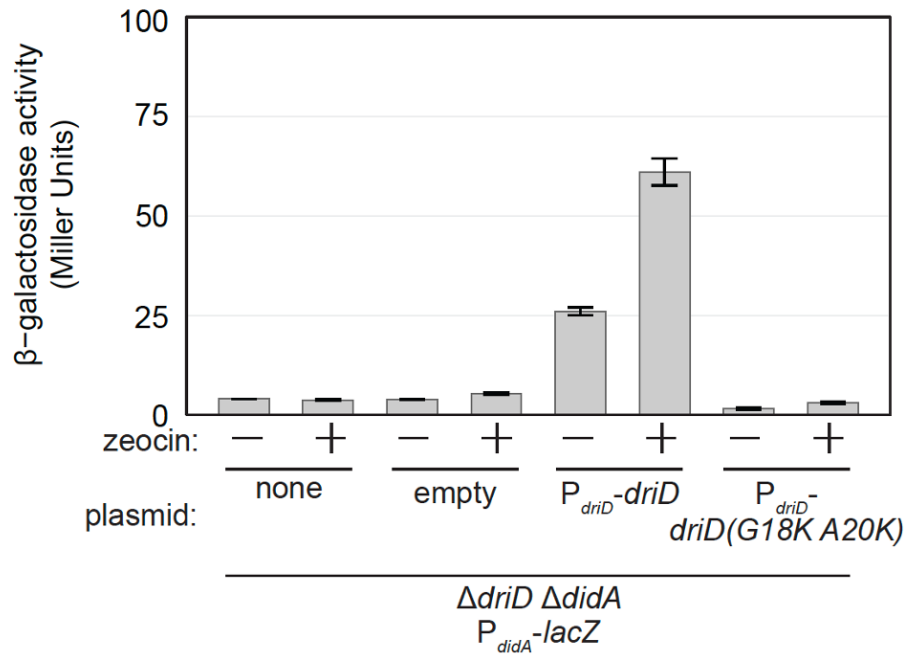

**Supplementary Figure 6.**  $\beta$ -galactosidase assays of the  $P_{didA}-lacZ$  as a readout for DriD-mediated transcription activation. Strains bearing a  $P_{didA}-lacZ$ , a  $driD$  deletion, and either no plasmid, an empty vector, a wild-type  $driD$  complementation or the mutant  $driD$  (G18K-A20K) were treated with zeocin to induce  $didA$  transcription activation. Mean and standard deviation of three biological replicates are shown.

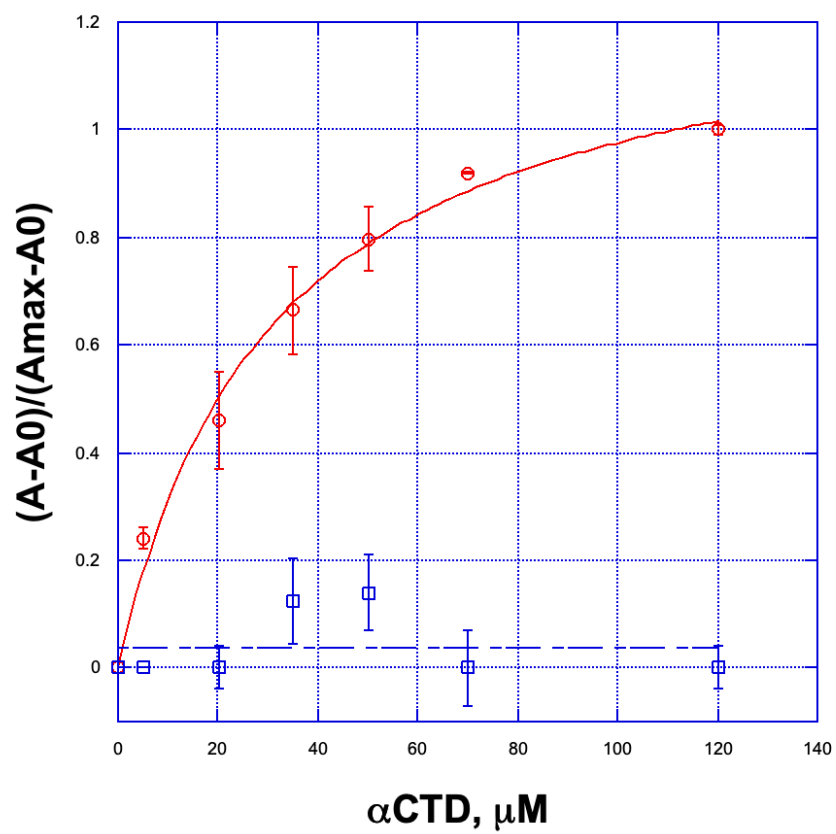

**Supplementary Figure 7.** FP binding isotherm showing binding of  $\alpha\text{CTD}$  to WT DriD-ssDNA-target DNA (red circles) and to DriD(R121E-R122E-P125E-E128R)-ssDNA-target DNA (blue squares). Three technical replicates were done for each.

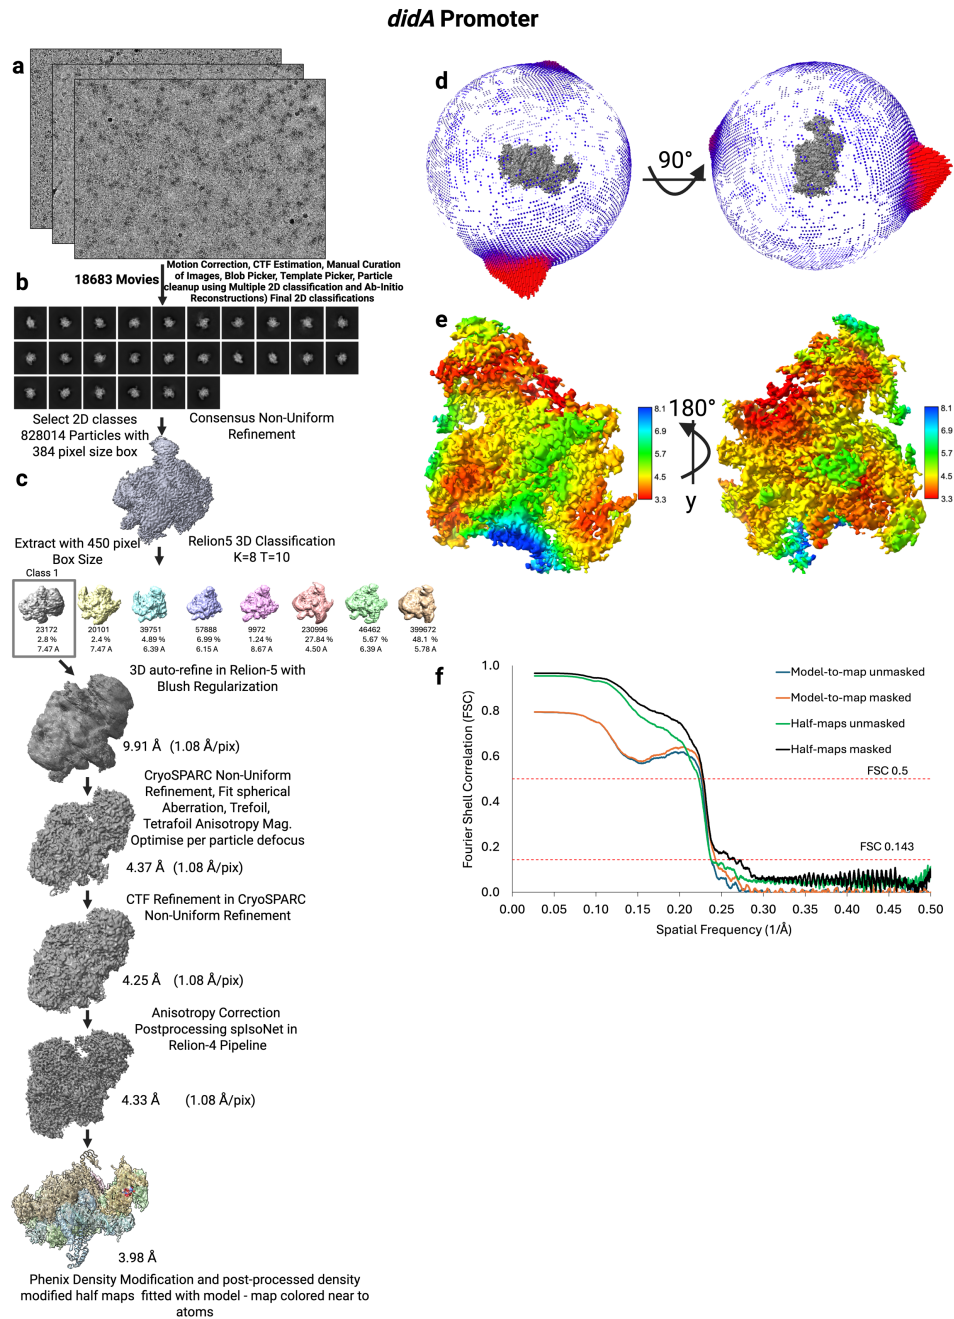

**Supplementary Figure 8. Cryo-EM data processing workflow of the DriD-ssDNA-RNAP-σ73-*didA* promoter structure.** (a) A few representative micrographs. (b) A subset of the 2D classes showing clear structural features. (c) Flow diagram of the data processing strategy. (d) Angular distribution maps of the final particle set used in the reconstruction of *Cc*-DriD-ssDNA-RNAP-σ73-*didA* promoter complex. (e) Final map colored by local resolution of *Cc*-DriD-ssDNA-RNAP-σ73-*didA* promoter complex between 3.3-8.1 Å. (f) Masked and unmasked half-map and model FSC curves used to determine global resolution.

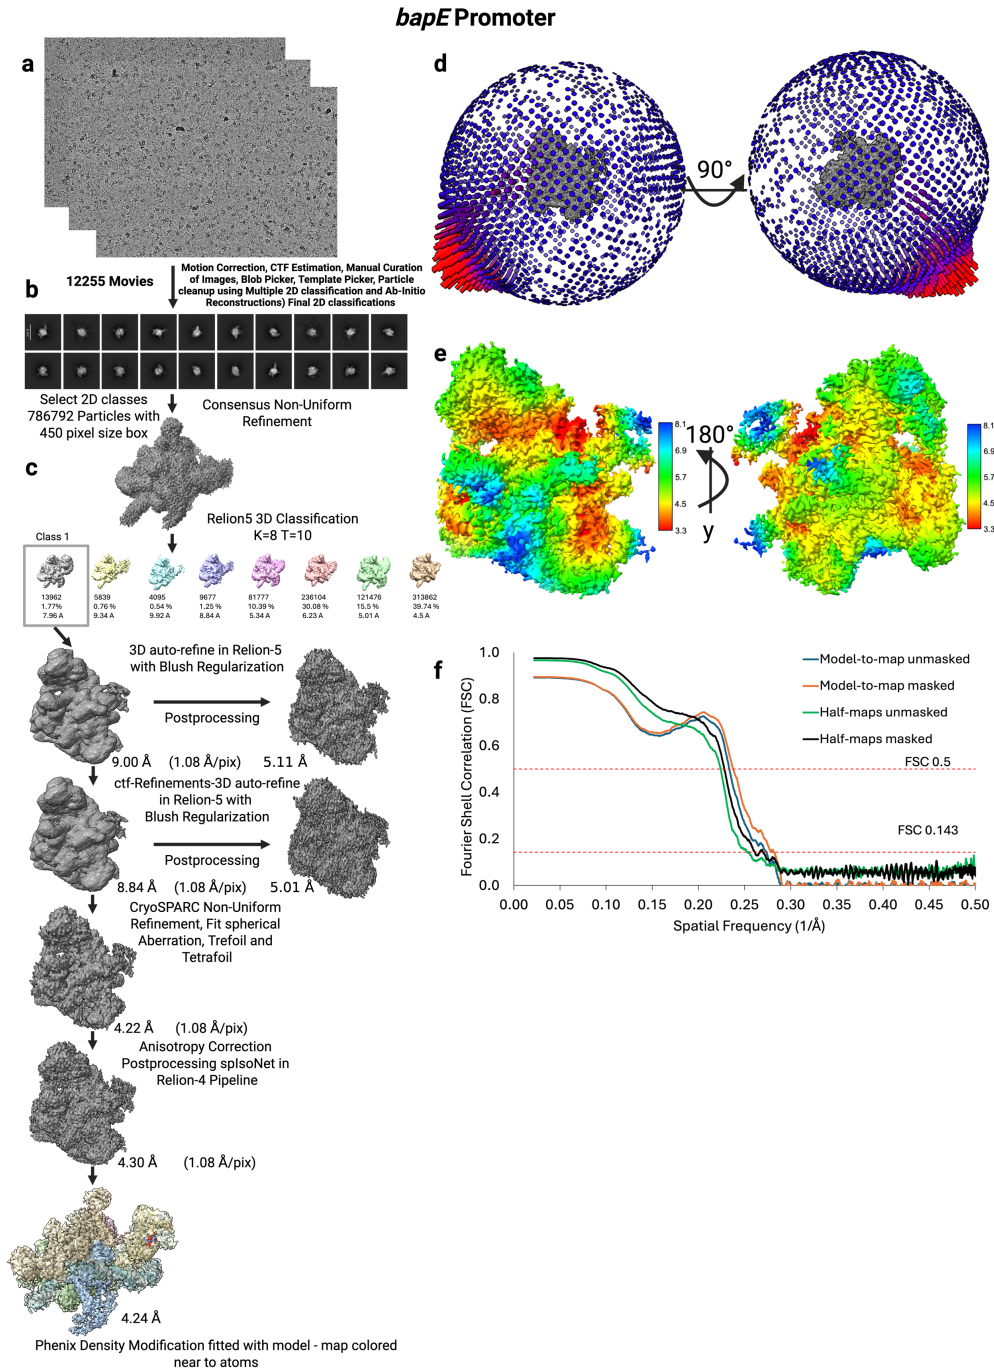

**Supplementary Figure 9. Cryo-EM data processing workflow of the DriD-ssDNA-RNAP- $\sigma$ 73-*bapE* promoter structure.** (a) A few representative micrographs. (b) A subset of the 2D classes showing clear structural features. (c) Flow diagram of the data processing strategy. (d) Angular distribution maps of the final particle set used in the reconstruction of *Cc*-DriD-ssDNA-RNAP- $\sigma$ 73-*bapE* promoter complex. (e) Final map colored by local resolution of *Cc*-DriD-ssDNA-RNAP- $\sigma$ 73-*bapE* promoter complex between 3.3-8.1 Å. (f) Masked and unmasked half-map and model FSC curves used to determine global resolution.



## DriD-ssDNA-RNAP- $\sigma$ 73-*ccna* promoter structure

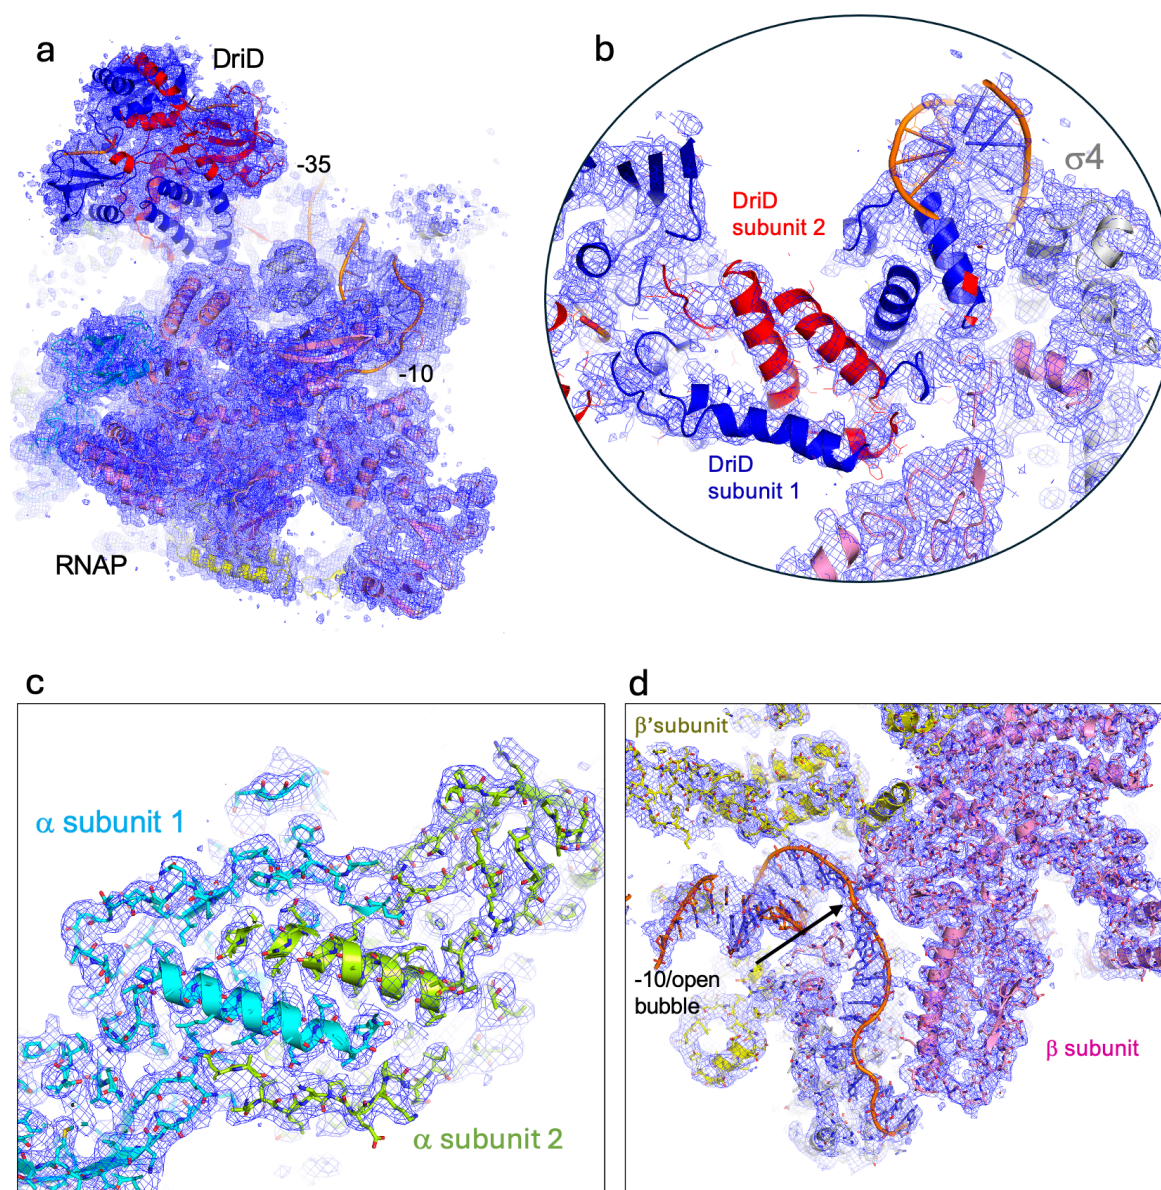

**Supplementary Figure 10. Representative densities for the cryo-EM DriD-ssDNA-RNAP- $\sigma$ 73-CCNA\_03891/CCNA\_01149 promoter DNA complex.** Shown is representative density for various regions of the structure, including the overall structure. **(a)** overall structure with the cryo-EM map included with the structural domains, DriD and DNA colored as in Figure 1 (map contour 1.7  $\sigma$ ). **(b)** Close up of the DriD DNABD region around the DNA and the  $\sigma$ 4 domain. **(c)** Close up of the RNAP  $\alpha$  subunit dimer region. **(d)** Density for the DNA open bubble and the  $\beta$  and  $\beta'$  subunits. Map contour for the two lower figures is 2.4  $\sigma$ .

# DriD-ssDNA-RNAP- $\sigma$ 73-*bapE* promoter structure

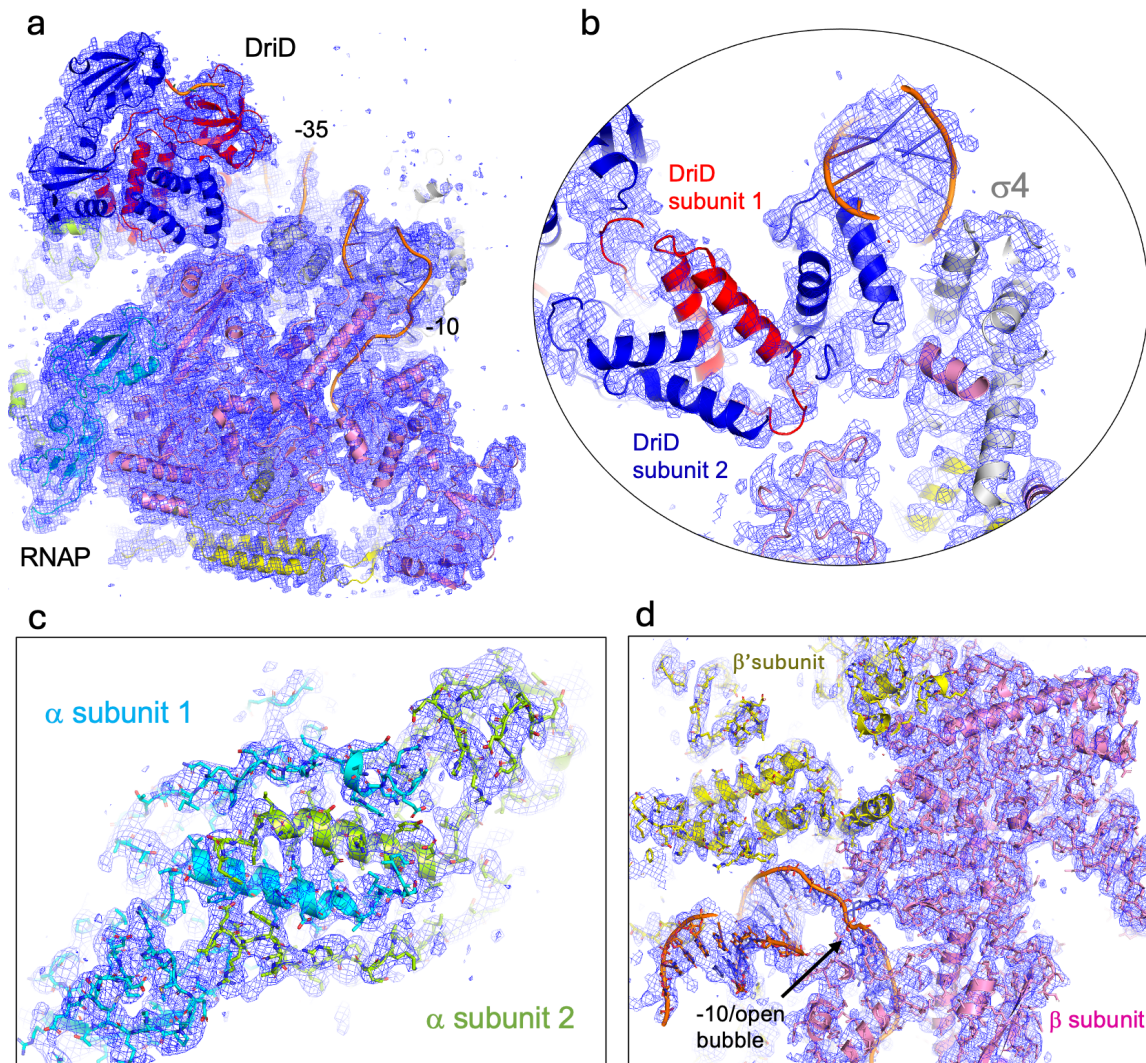

**Supplementary Figure 11. Representative densities for the cryo-EM DriD-ssDNA-RNAP- $\sigma$ 73-*bapE* promoter DNA complex.** Shown is representative density for various regions of the structure, including the overall structure. **(a)** Overall structure with the cryo-EM map included with the structural domains, DriD and DNA colored as in Figure 4 **(b)**. **(b)** Close up of the DriD DNABD region around the DNA and the  $\sigma$ 4 domain. The map contour is 4.7  $\sigma$ . **(c)** Close up of the RNAP  $\alpha$  subunit dimer region. **(d)** Density for the DNA open bubble and the  $\beta$  and  $\beta'$  subunits (map contour 5.2  $\sigma$ ).



# DriD-ssDNA-RNAP- $\sigma$ 73-*didA* promoter structure

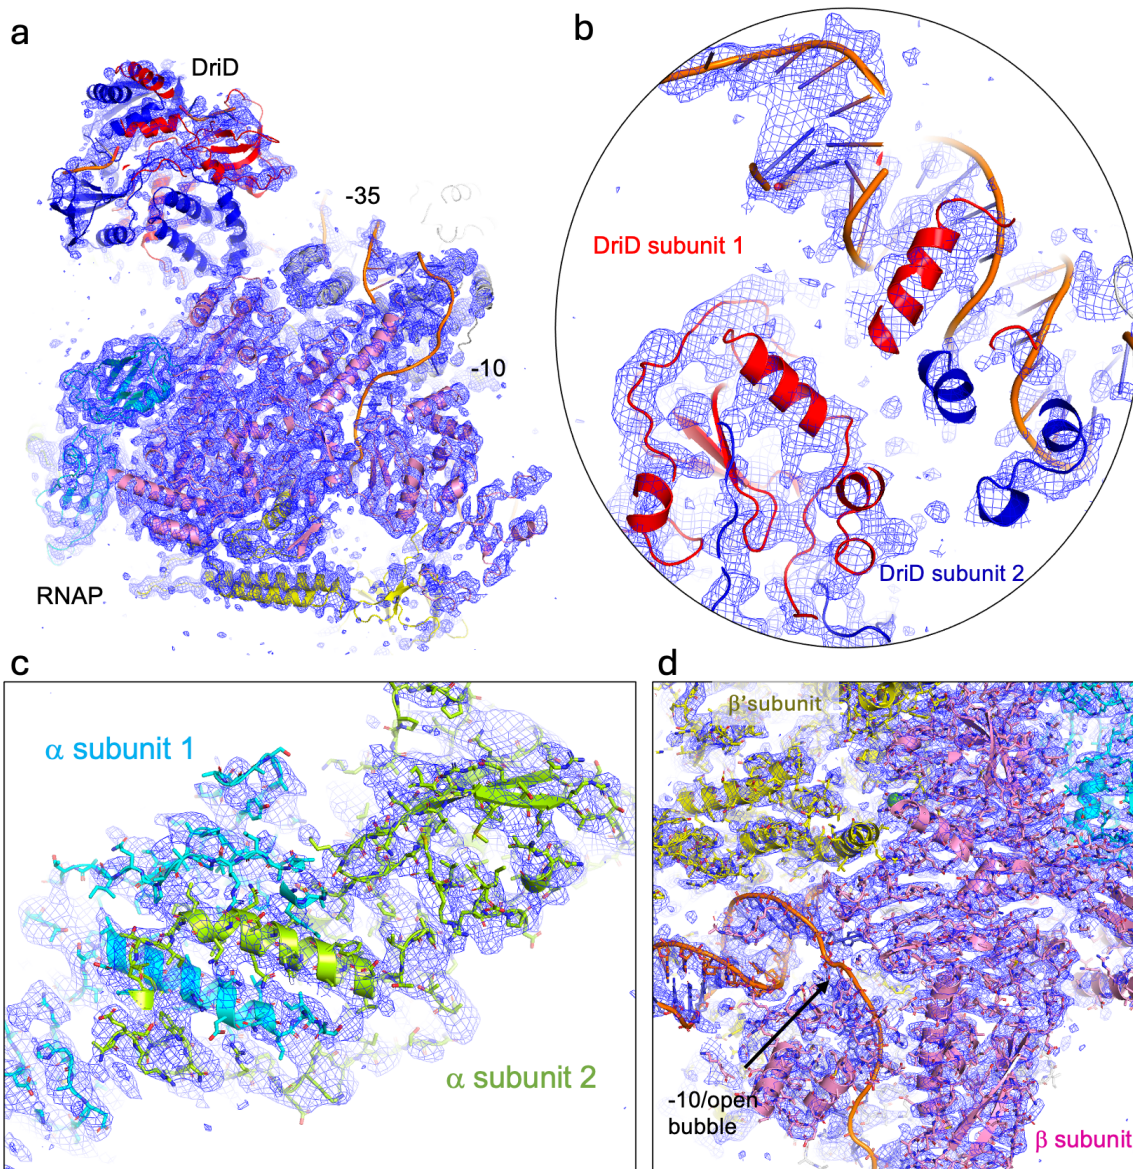

**Supplementary Figure 12. Representative densities for the cryo-EM DriD-ssDNA-RNAP- $\sigma$ 73-*didA* promoter DNA complex.** Shown is representative density for various regions of the structure, including the overall structure. **(a)** Overall structure with the cryo-EM map included with the structural domains. **(b)** Close up of the DriD DNABD region around the DNA and the  $\sigma$ 4 domain. The map contour for the top panels is 4.3  $\sigma$ . **(c)** Close up of the RNAP  $\alpha$  subunit dimer region. **(d)** Density for the DNA open bubble and the  $\beta$  and  $\beta'$  subunits. Map contour of 5.3  $\sigma$ .

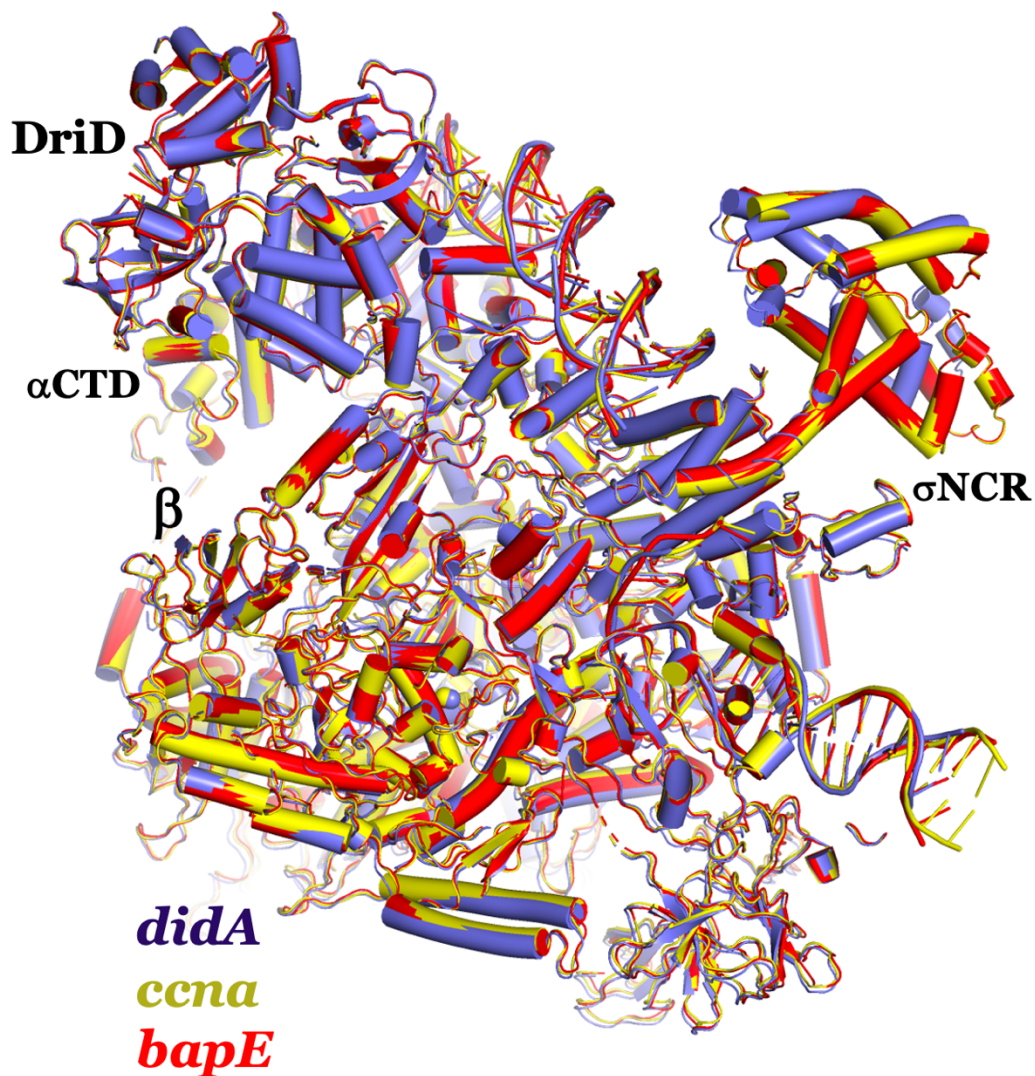

**Supplementary Figure 13. Overlay of DriD-ssDNA promoter complexes.** Colored in yellow, violet and light\_blue are the DriD-ssDNA-RNAP-σ73-*CCNA\_03891/CCNA\_01149* (*ccna*), DriD-ssDNA-RNAP-σ73-*bapE* and DriD-ssDNA-RNAP-σ73-*didA* promoter complexes, respectively. The complex overlays with rmsds of less than 1.9 Å indicating they are essentially identical in their arrangements.

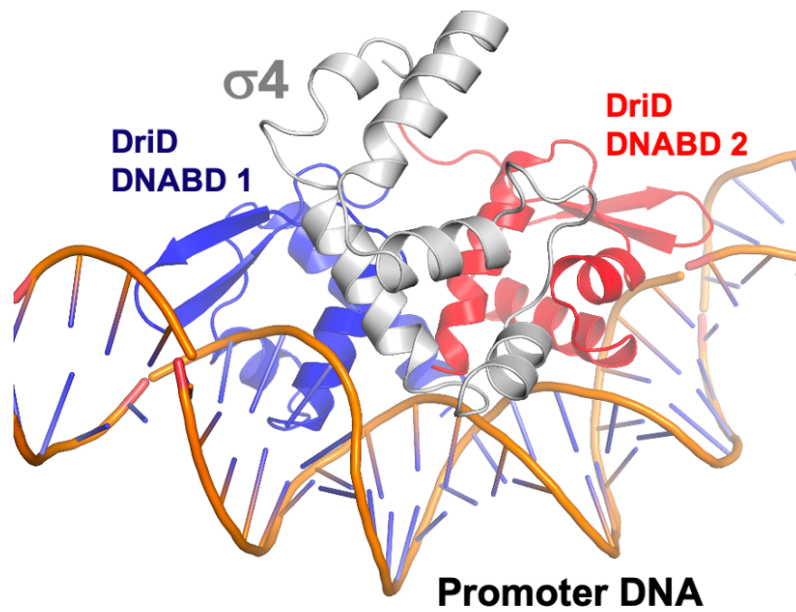

**Supplementary Figure 14. The -35 promoter elements in DriD regulated promoters are located at the center of the DriD target DNA binding sites.** Shown is a close-up of just the DriD DNABDs, colored blue and red and labeled, bound to the *CCNA\_03891/CCNA\_01149* promoter with the  $\sigma 4$  domain, colored grey, included. Notably, the DriD DNABDs sandwich the bound  $\sigma 4$  domain, which docks onto the -35 element.

Supplementary Table 1. Cryo-EM analyses and structure statistics

| Cryo-EM data collection, refinement, and validation statistics.                             |                                               |                                    |                                          |                                          |
|---------------------------------------------------------------------------------------------|-----------------------------------------------|------------------------------------|------------------------------------------|------------------------------------------|
|                                                                                             | <i>DriD-ssDNA-RNAP-σ73-driD/ccna promoter</i> | <i>RNAP-σ73-driD/ccna promoter</i> | <i>DriD-ssDNA-RNAP-σ73-didA promoter</i> | <i>DriD-ssDNA-RNAP-σ73-bapE promoter</i> |
|                                                                                             | PDB: 9PFV                                     | PDB: 9PGH                          | PDB: 9PGA                                | PDB: 9PFQ                                |
|                                                                                             | EMD-71615                                     | EMD-71632                          | EMD-71624                                | EMD-71610                                |
|                                                                                             |                                               |                                    |                                          |                                          |
| <b>Data collection and Processing</b>                                                       |                                               |                                    |                                          |                                          |
| Electron microscope                                                                         | Titan Krios (Duke)                            | Titan Krios (Duke)                 | Titan Krios (Duke)                       | Titan Krios (Duke)                       |
| Detector                                                                                    | K3                                            | K3                                 | K3                                       | K3                                       |
| Magnification                                                                               | 81,000x                                       | 81,000x                            | 81,000x                                  | 81,000x                                  |
| Voltage (keV)                                                                               | 300                                           | 300                                | 300                                      | 300                                      |
| Electron exposure (e-/Å^2)                                                                  | 58.7                                          | 58.7                               | 56.6                                     | 59                                       |
| Number of frames per movie                                                                  | 60                                            | 60                                 | 60                                       | 60                                       |
| Defocus range (μm)                                                                          | -0.8 to -2.5                                  | -0.8 to -2.5                       | -0.8 to -2.5                             | -0.8 to -2.5                             |
| Pixel size (Å)                                                                              | 1.08                                          | 1.08                               | 1.08                                     | 1.08                                     |
| Initial micrographs                                                                         | 15406                                         | 15406                              | 18683                                    | 12255                                    |
| Final micrographs                                                                           | 14781                                         | 14781                              | 16387                                    | 11122                                    |
| Total extracted particles (no.)                                                             | 2,373,048                                     | 2,373,048                          | 2,019,352                                | 811,774                                  |
| Refined particles (no.)                                                                     | 1,357,922                                     | 1,357,922                          | 828,014                                  | 807,385                                  |
|                                                                                             |                                               |                                    |                                          |                                          |
| <b>Reconstruction</b>                                                                       |                                               |                                    |                                          |                                          |
| Final particles (no.)                                                                       | 68,485                                        | 150,644                            | 23,172                                   | 13,962                                   |
| Box size (unbinned) (pixels)                                                                | 384                                           | 384                                | 450                                      | 450                                      |
| Symmetry imposed                                                                            | C1                                            | C1                                 | C1                                       | C1                                       |
| FSC 0.143 (unmasked/masked) (Å)                                                             | 4.41/4.10                                     | 4.41/3.77                          | 4.31/4.22                                | 4.46/4.22                                |
| Map sharpening B-factor (Å^2)                                                               | -75.86                                        | -97.37                             | -35.4                                    | -31                                      |
|                                                                                             |                                               |                                    |                                          |                                          |
| <b>spIsoNet Misalignment and Anisotropy Correction</b>                                      |                                               |                                    |                                          |                                          |
| FSC 0.143 (masked) (Å)                                                                      | 3.7                                           | 3.54                               | 4.33                                     | 4.3                                      |
| Map sharpening B-factor (Å^2)                                                               | -59.11                                        | -70.45                             | -35.4                                    | -31                                      |
|                                                                                             |                                               |                                    |                                          |                                          |
| <b>Phenix Density Modification (Å)</b>                                                      |                                               |                                    |                                          |                                          |
|                                                                                             | 3.7                                           | NA                                 | 3.98                                     | 4.24                                     |
|                                                                                             |                                               |                                    |                                          |                                          |
| <b>Refinement</b>                                                                           |                                               |                                    |                                          |                                          |
| <b>Model composition</b>                                                                    |                                               |                                    |                                          |                                          |
| Non-hydrogen atoms                                                                          | 36,328                                        | 30,040                             | 35,717                                   | 36,042                                   |
| Protein residues                                                                            | 4,461                                         | 3,718                              | 4,425                                    | 4,453                                    |
| Nucleotides                                                                                 | 125                                           | 97                                 | 121                                      | 121                                      |
| Ions/Ligands                                                                                | 3                                             | 3                                  | 3                                        | 3                                        |
| MolProbity score                                                                            | 1.97                                          | 1.99                               | 2.22                                     | 2.02                                     |
| Clash score                                                                                 | 9.38                                          | 10.3                               | 15.19                                    | 10.68                                    |
| <b>Bonds (RMSD)</b>                                                                         |                                               |                                    |                                          |                                          |
| Bond lengths (Å)                                                                            | 0.003                                         | 0.004                              | 0.004                                    | 0.004                                    |
| Bond angles (°)                                                                             | 0.556                                         | 0.658                              | 0.677                                    | 0.697                                    |
| <b>Ramachandran plot (%)</b>                                                                |                                               |                                    |                                          |                                          |
| Favored (%)                                                                                 | 92.31                                         | 92.75                              | 90.49                                    | 92.16                                    |
| Allowed (%)                                                                                 | 7.69                                          | 7.25                               | 9.51                                     | 7.79                                     |
| Disallowed (%)                                                                              | 0.00                                          | 0.00                               | 0.00                                     | 0.05                                     |
| Foot Note: NA-Not applicable; RNAP-σ73-driD/ccna promoter complex was not density modified. |                                               |                                    |                                          |                                          |



**Supplementary Table 2.** Strains used in this study

| Strains | Description                                                                                                                                                                                                      | Source     |
|---------|------------------------------------------------------------------------------------------------------------------------------------------------------------------------------------------------------------------|------------|
| ML76    | CB15N wild-type                                                                                                                                                                                                  | 1          |
| ML77    | CB15N <i>rec526</i>                                                                                                                                                                                              | 2          |
| ML3757  | CB15N $\Delta$ <i>driD</i> :: <i>tet</i> <sup>R</sup>                                                                                                                                                            | 3          |
| ML3760  | CB15N pRVMCS-2( <i>kan</i> <sup>R</sup> ):P <sub><i>driD</i></sub> - <i>driD</i> ; $\Delta$ <i>driD</i> :: <i>tet</i> <sup>R</sup> , $\Delta$ <i>didA</i> , <i>hfaB</i> ::P <sub><i>didA</i></sub> - <i>lacZ</i> | 3          |
| KG570   | CB15N $\Delta$ <i>driD</i> :: <i>tet</i> <sup>R</sup> , $\Delta$ <i>didA</i> , <i>hfaB</i> ::P <sub><i>didA</i></sub> - <i>lacZ</i>                                                                              | 4          |
| ML2174  | CB15N $\Delta$ <i>driD</i>                                                                                                                                                                                       | 5          |
| KG720   | CB15N <i>hfaB</i> ::P <sub><i>didA</i></sub> - <i>lacZ</i>                                                                                                                                                       | This study |
| KG721   | CB15N $\Delta$ <i>driD</i> , <i>hfaB</i> ::P <sub><i>didA</i></sub> - <i>lacZ</i>                                                                                                                                | This study |
| KG722   | CB15N $\Delta$ <i>driD</i> , <i>hfaB</i> ::P <sub><i>didA</i></sub> - <i>lacZ</i> , pRVMCS-2 (empty)                                                                                                             | This study |
| KG723   | CB15N $\Delta$ <i>driD</i> , <i>hfaB</i> ::P <sub><i>didA</i></sub> - <i>lacZ</i> , pRVMCS-2::P <sub><i>driD</i></sub> - <i>driD</i>                                                                             | This study |
| KG724   | CB15N <i>hfaB</i> ::P <sub>03891/01149</sub> - <i>lacZ</i>                                                                                                                                                       | This study |
| KG725   | CB15N $\Delta$ <i>driD</i> , <i>hfaB</i> ::P <sub>03891/01149</sub> - <i>lacZ</i>                                                                                                                                | This study |
| KG726   | CB15N $\Delta$ <i>driD</i> , <i>hfaB</i> ::P <sub>03891/01149</sub> - <i>lacZ</i> , pRVMCS-2 (empty)                                                                                                             | This study |
| KG727   | CB15N $\Delta$ <i>driD</i> , <i>hfaB</i> ::P <sub>03891/01149</sub> - <i>lacZ</i> , pRVMCS-2::P <sub><i>driD</i></sub> - <i>driD</i>                                                                             | This study |
| KG728   | CB15N <i>hfaB</i> ::P <sub><i>driD</i></sub> - <i>lacZ</i>                                                                                                                                                       | This study |
| KG729   | CB15N $\Delta$ <i>driD</i> , <i>hfaB</i> ::P <sub><i>driD</i></sub> - <i>lacZ</i>                                                                                                                                | This study |
| KG730   | CB15N $\Delta$ <i>driD</i> , <i>hfaB</i> ::P <sub><i>driD</i></sub> - <i>lacZ</i> , pRVMCS-2 (empty)                                                                                                             | This study |
| KG731   | CB15N $\Delta$ <i>driD</i> , <i>hfaB</i> ::P <sub><i>driD</i></sub> - <i>lacZ</i> , pRVMCS-2::P <sub><i>driD</i></sub> - <i>driD</i>                                                                             | This study |
| KG732   | CB15N $\Delta$ <i>driD</i> :: <i>tet</i> <sup>R</sup> , $\Delta$ <i>didA</i> , <i>hfaB</i> ::P <sub><i>didA</i></sub> - <i>lacZ</i> , pRVMCS-2::P <sub><i>driD</i></sub> - <i>driD</i> (G18K A20K)               | This study |
| KG733   | CB15N $\Delta$ <i>driD</i> :: <i>tet</i> <sup>R</sup> , $\Delta$ <i>didA</i> , <i>hfaB</i> ::P <sub><i>didA</i></sub> - <i>lacZ</i> , pRVMCS-2::P <sub><i>driD</i></sub> - <i>driD</i> *                         | This study |

**Supplementary Table 3.** Plasmids used in this study

| Plasmids                                                      | Description                                                                                    | Source     |
|---------------------------------------------------------------|------------------------------------------------------------------------------------------------|------------|
| pRVMCS-2 (empty)                                              | low-copy vector bearing inducible promoter and <i>kan<sup>R</sup></i>                          | 6          |
| pNPTS138                                                      | used to create genome modifications via homologous recombination                               | 6          |
| pNPTS138- <i>hfaB::lacZ</i>                                   | pNPTS138 bearing <i>lacZ</i> flanked by <i>hfaB</i> upstream and downstream homology regions   | This study |
| pRVMCS-2:: P <sub><i>driD</i></sub> - <i>driD</i>             | pRVMCS-2 with P <sub><i>driD</i></sub> - <i>driD</i> at <i>SacI</i> / <i>SacII</i>             | 3          |
| pRVMCS-2:: P <sub><i>driD</i></sub> - <i>driD</i> (G18K A20K) | pRVMCS-2 with P <sub><i>driD</i></sub> - <i>driD</i> (G18K A20K) at <i>SacI</i> / <i>SacII</i> | This study |
| pNPTS138- <i>hfaB::P<sub>didA</sub>-lacZ</i>                  | pNPTS138 bearing <i>hfaB</i> -P <sub><i>didA</i></sub> - <i>lacZ</i> - <i>hfaB</i>             | This study |
| pNPTS138- <i>hfaB::P<sub>driD</sub>-lacZ</i>                  | pNPTS138 bearing <i>hfaB</i> -P <sub><i>driD</i></sub> - <i>lacZ</i> - <i>hfaB</i>             | This study |
| pNPTS138- <i>hfaB::P<sub>03891/01149</sub>-lacZ</i>           | pNPTS138 bearing <i>hfaB</i> -P <sub>03891/01149</sub> - <i>lacZ</i> - <i>hfaB</i>             | This study |

**Supplementary Table 4.** Oligonucleotides used in this study

| Oligonucleotides                                                                                                                      | Sequence                                   |
|---------------------------------------------------------------------------------------------------------------------------------------|--------------------------------------------|
| <b>qRT-PCR of <i>rpoA</i></b>                                                                                                         |                                            |
| oKRG360                                                                                                                               | ACATCGTCTACATCGGCGAC                       |
| oKRG361                                                                                                                               | GGCGAGCACTTCCTTGATCT                       |
| <b>qRT-PCR of <i>driD</i></b>                                                                                                         |                                            |
| oKRG322                                                                                                                               | ACCTGAAGGTGCTCGACAAG                       |
| oKRG323                                                                                                                               | GTCGTGATAGATGCCGAAGC                       |
| <b>qRT-PCR of <i>didA</i></b>                                                                                                         |                                            |
| oKRG356                                                                                                                               | GCTCATGCTGTTCGTGGTC                        |
| oKRG357                                                                                                                               | CTACCAGCCCCAGTGACG                         |
| <b>qRT-PCR of <i>CCNA_03891</i></b>                                                                                                   |                                            |
| oKRG723                                                                                                                               | CTTCGCCGACATCCATCGC                        |
| oKRG724                                                                                                                               | GGTGACGCGGACGATCTG                         |
| <b>qRT-PCR of <i>CCNA_01149</i></b>                                                                                                   |                                            |
| oKRG717                                                                                                                               | CGGTCAGCAACGCCGTCAAC                       |
| oKRG718                                                                                                                               | GAGGCCGTAACCGGTCAGG                        |
| <b>Cloning of <i>hfaB</i> UHR (627/628), DHR (629/630) and <i>lacZ</i> (802/803) into pNPTS138 to make pNPTS138-<i>hfaB::lacZ</i></b> |                                            |
| oKRG627                                                                                                                               | cagcagCTTAAGTGTCTGTTTCGACGTCACAGC          |
| oKRG628                                                                                                                               | cagcagGTCGACACACCGACGGCCTGAAGGG            |
| oKRG629                                                                                                                               | cagcagAAGCTTGGATGTTGTAGTTCAGCTCGGTGATGC    |
| oKRG630                                                                                                                               | cagcagACTAGTAACAATACCGTCATCGTCAATTCCAGCC   |
| oKRG802                                                                                                                               | gacgacATGACCATGATTACGGAT                   |
| oKRG803                                                                                                                               | tactacAAGCTTTTATTTTGTACACCAGACCAACTG       |
| <b>Cloning of <i>didA</i> promoter to make pNPTS138-<i>hfaB::P<sub>didA</sub>-lacZ</i></b>                                            |                                            |
| oKRG783                                                                                                                               | cagcaggtcgacGGTGATCGTCTGGCCCATGG           |
| oKRG784                                                                                                                               | cagcagggatccTCTCCTTcCctcatctgatggaagegacc  |
| <b>Cloning of <i>driD</i> promoter to make pNPTS138-<i>hfaB::P<sub>driD</sub>-lacZ</i></b>                                            |                                            |
| oKRG785                                                                                                                               | cagcaggtcgacCGAAGGTCCTTGGGTTCTCCAG         |
| oKRG786                                                                                                                               | cagcagggatccTCTCCTTcTCATACGACCGTTTCTGTTCGC |
| <b>Cloning of <i>CCNA_03891/01149</i> promoter to make pNPTS138-<i>hfaB::P<sub>03891/01149</sub>-lacZ</i></b>                         |                                            |
| oKRG799                                                                                                                               | cagcaggtcgacGccgcccgtcATACGACC             |
| oKRG800                                                                                                                               | cagcagggatccTCTCCTTcCttgggttctccAGGGGTGATG |
| <b>PCR of <i>driD</i> for fusion cloning</b>                                                                                          |                                            |

|                                                               |                                     |
|---------------------------------------------------------------|-------------------------------------|
|                                                               |                                     |
| oKRG316                                                       | GATCCCGCGGTTTCATGCCCTGGCTCCTACCAC   |
| oKRG317                                                       | GATCGAGCTCGTCAGGCGCAGAGACGCAGGGGTTC |
| <b>Cloning of pRVMCS-2::P<sub>driD</sub>-driD (G18K A20K)</b> |                                     |
| oKRG797                                                       | GCTGGCTAAGTCCAAAGAGGGGCTG           |
| oKRG798                                                       | CAGCCCCTCTTTGGACTTAGCCAGC           |

## Supplementary References

1. Evinger, M. & Agabian, N. (1977) Envelope-associated nucleoid from *Caulobacter crescentus* stalked and swarmer cells. *J. Bacteriol.* **132**, 294-301 (1977).
2. O'Neill, E.A., Hynes R.H. & Bender R.A. (1985) Recombination deficient mutant of *Caulobacter crescentus*. *Mol. Gen. Genet.* **198**, 275-278 (1985).
3. Gozzi, K., Salinas, R., Nguyen, V.D., Laub, M.T. & Schumacher, M. ssDNA is an allosteric regulator of the *C. crescentus* SOS-independent DNA damage response transcription activator, DriD. *Genes & Dev.* **36**, 618-633 (2022).
4. Schumacher, M.A., Cannistraci E., Salinas, R., Lloyd, D., Messner, E. & Gozzi, K. Structure of the WYL-domain containing transcription activator, DriD, in complex with ssDNA effector and DNA target site. *Nucleic Acids Res.* **52**, 1435-1449 (2023).
5. Modell, J.W., Kambara, T.K., Perchuck, B.S. & Laub, M.T. A DNA damage-induced, SOS-independent checkpoint regulates cell division in *Caulobacter crescentus*. *PLoS Biol.* **12**, e1001977 (2014).
6. Thanbichler, M., Iniesta, A.A. & Shapiro, L. A comprehensive set of plasmids for vanillate- and xylose- inducible gene expression in *Caulobacter crescentus*. *Nucleic Acids Res.* **35**, 3137 (2007).
