# Supplementary material for: Transcription activation mechanism of a non-canonical bacterial DNA damage response pathway
Source: Research Square preprint supplement (doi:10.21203/rs.3.rs-7152246/v1), 2025-08-05
Supplement: Supplementary file 1 [file 641a786e4d1c1be92aa196bc.docx]

**Supplementary Movie 1**. **3D Overview of cryo-EM structure of the *C. crescentus* DriD-ssDNA-RNAP-s73-*CCNA_03891/CCNA_01149* promoter transcription activation complex.** Related to figure 1. The movie provides a 360° overview of the complex and overlaid cryo-EM map, rotating on y-axis, followed by zoom in features highlighting the RNAP-β subunit and DriD interactions, DriD-DNABD-promoter-DNA-interactions, RNAP-α-CTD and DriD interactions and the RNAP-σ4-promoter interface. The map is contoured at the 0.013 threshold level.
